# Supplementary material
Source: PubMed Central journal article supplement (PMC2643843)
Supplement: NIHMS85910-supplement-01.pdf [file NIHMS85910-supplement-01.pdf]

**Supplemental Table 1. Comparison of baseline characteristics of the total VHM&PP cohort and the VHM&PP study cohort for assessment of longitudinal GGT-Change, 1985-2005**

|                                                      | Males                                            |                                | Females                                          |                                |
|------------------------------------------------------|--------------------------------------------------|--------------------------------|--------------------------------------------------|--------------------------------|
|                                                      | Cohort for assessment of longitudinal GGT-change | Total VHM&PP Cohort, 1985-2005 | Cohort for assessment of longitudinal GGT-change | Total VHM&PP Cohort, 1985-2005 |
|                                                      | (n=32,365)                                       | (n=85,035)                     | (n=43,748)                                       | (n=99,739)                     |
| Age, mean±SD (range), y                              | 42.1±13.6 (18-89)                                | 41.6±15.1 (18-96)              | 42.0±14.4 (19-90)                                | 41.7±15.8 (18-95)              |
| Body-mass-index, mean±SD (median), kg/m <sup>2</sup> | 25.3±3.4 (25.0)                                  | 25.4±3.7 (24.9)                | 24.1±4.3 (23.3)                                  | 24.2±4.6 (23.3)                |
| Glucose, mean±SD (median), mg/dL                     | 86.4±22.0 (84.0)                                 | 91.1±24.8 (87.0)               | 84.3±18.4 (83.0)                                 | 86.7±20.8 (84.0)               |
| Triglycerides, mean±SD (median), mg/dL               | 152.4±105.4 (123.0)                              | 148.8±106.9 (117.0)            | 111.4±64.9 (95.0)                                | 111.4±67.6 (94.0)              |
| Total Cholesterol, mean±SD (median), mg/dL           | 220.9±46.8 (218.0)                               | 214.0±47.9 (210.0)             | 216.1±46.5 (211.0)                               | 213.0±46.6 (208.0)             |
| Gamma-glutamyltransferase, mean±SD (median), U/L     | 42.2±55.7 (28.6)                                 | 43.9±63.0 (28.6)               | 23.7±29.2 (17.9)                                 | 24.1±33.1 (17.9)               |
| Systolic Blood Pressure, mean±SD (median), mm Hg     | 131.9±18.0 (130.0)                               | 132.0±19.2 (130.0)             | 127.6±20.8 (125.0)                               | 127.5±21.7 (124.0)             |
| Diastolic Blood Pressure, mean±SD (median), mm Hg    | 81.8±10.7 (80.0)                                 | 81.5±10.9 (80.0)               | 79.3±11.0 (80.0)                                 | 79.0±11.2 (80.0)               |
| Occupational status                                  |                                                  |                                |                                                  |                                |
| Blue collar - (%)                                    | 31.7                                             | 37.8                           | 36.4                                             | 37.3                           |
| White collar - (%)                                   | 58.3                                             | 51.8                           | 56.5                                             | 53.6                           |
| Self-employed - (%)                                  | 10.0                                             | 10.4                           | 7.1                                              | 9.1                            |
| Current or Former Cigarette Smoking - (%)            | 31.5                                             | 29.6                           | 23.4                                             | 20.0                           |
| Total Mortality - no (%)                             | 2,304 (7.1)                                      | 7,391 (8.7)                    | 2,247 (5.1)                                      | 6,817 (6.8)                    |
| Cardiovascular/cerebrovascular deaths - no. (%)      | 986 (3.0)                                        | 3063 (3.6)                     | 969 (2.2)                                        | 3,709 (3.7)                    |

All presented values are referring to baseline (i.e. measurement at first visit)

**Supplemental Table 2. All-cause mortality and mortality from cardiovascular disease in male VHM&PP participants according to categories of longitudinal GGT-change after excluding participants with baseline GGT concentrations >60 U/L and/or an GGT increase into the abnormal range (>60 U/L), VHM&PP 1985-2005**

|                                                         | Longitudinal GGT-change |                    |                  |                 |                  |                    |                      | p for trend GGT decrease* | p for trend GGT increase* |
|---------------------------------------------------------|-------------------------|--------------------|------------------|-----------------|------------------|--------------------|----------------------|---------------------------|---------------------------|
|                                                         | Decrease                |                    |                  | Stable          | Increase         |                    |                      |                           |                           |
|                                                         | Pronounced<br>n=1850    | Moderate<br>n=4177 | Mild<br>n=4441   |                 | Mild<br>n=4466   | Moderate<br>n=4231 | Pronounced<br>n=2455 |                           |                           |
| Longitudinal 7-year GGT-change (U/L) - Range            | <(-7.99)                | -7.98-(-3.03)      | -3.02-(-0.69)    | -0.68-1.26      | 1.27-3.76        | 3.77-9.16          | >9.17                |                           |                           |
| Longitudinal 7-year GGT-change - mean±SD (median) (U/L) | -12.8±11.7 (-11.0)      | -5.0±1.4 (-4.8)    | -1.8±0.7 (-1.7)  | 0.3±0.6 (0.2)   | 2.4±0.7 (2.4)    | 5.9±1.5 (5.7)      | 15.1±5.9 (13.2)      |                           |                           |
| Baseline GGT - mean±SD (median) (U/L)                   | 43.8±10.1 (44.8)        | 33.1±10.6 (32.2)   | 26.5±9.9 (25.1)  | 23.8±9.6 (21.5) | 23.0±9.6 (21.5)  | 24.9±10.5 (23.3)   | 26.3±9.0 (25.1)      |                           |                           |
| <b>ALL-CAUSE MORTALITY (n=1621)</b>                     |                         |                    |                  |                 |                  |                    |                      |                           |                           |
| HR (95% CI)†                                            | 0.99 (0.80-1.22)        | 1.07 (0.90-1.26)   | 0.95 (0.80-1.13) | 1.00 (Ref)      | 1.09 (0.91-1.31) | 1.15 (0.95-1.39)   | 1.39 (1.12-1.72)     | 0.88                      | 0.003                     |
| <b>TOTAL CVD MORTALITY (n=700)</b>                      |                         |                    |                  |                 |                  |                    |                      |                           |                           |
| HR (95% CI)†                                            | 0.95 (0.69-1.31)        | 1.00 (0.77-1.29)   | 0.96 (0.77-1.25) | 1.00 (Ref)      | 1.11 (0.84-1.47) | 1.26 (0.95-1.68)   | 1.36 (0.98-1.90)     | 0.89                      | 0.027                     |
| <b>CORONARY HEART DISEASE (n=384)</b>                   |                         |                    |                  |                 |                  |                    |                      |                           |                           |
| HR (95% CI)†                                            | 0.96 (0.62-1.48)        | 0.99 (0.70-1.41)   | 0.99 (0.70-1.42) | 1.00 (Ref)      | 1.14 (0.78-1.66) | 1.35 (0.93-1.97)   | 1.03 (0.63-1.68)     | 0.93                      | 0.29                      |
| <b>CONGESTIVE HEART FAILURE (n=62)</b>                  |                         |                    |                  |                 |                  |                    |                      |                           |                           |
| HR (95% CI)†                                            | 1.63 (0.62-4.33)        | 0.77 (0.30-2.00)   | 1.39 (0.60-3.24) | 1.00 (Ref)      | 0.77 (0.27-2.19) | 1.04 (0.37-2.93)   | 1.25 (0.39-4.11)     | 0.90                      | 0.80                      |
| <b>STROKE (n=157)</b>                                   |                         |                    |                  |                 |                  |                    |                      |                           |                           |
| HR (95% CI)†                                            | 0.85 (0.42-1.71)        | 1.11 (0.65-1.92)   | 0.76 (0.42-1.36) | 1.00 (Ref)      | 1.04 (0.57-1.91) | 1.35 (0.74-2.47)   | 1.98 (1.04-3.78)     | 0.98                      | 0.025                     |

\*Log-linear trends across categories of increasing or decreasing GGT, in respect to stable GGT, were tested using the median GGT-change for each category as an ordinal variable in an extended Cox proportional hazards model adjusted for age, body-mass-index, smoking status, occupational status, triglycerides, total cholesterol, systolic and diastolic blood pressure and blood glucose as time-varying covariates. All models are additionally adjusted for baseline GGT and the period of GGT-change assessment. GGT and triglycerides were log-transformed.

†Estimated from extended Cox proportional hazards models adjusted for age, body-mass-index, smoking status, occupational status, triglycerides, total cholesterol, systolic and diastolic blood pressure and blood glucose as time-varying covariates. All models are additionally adjusted for baseline GGT and period of GGT-change assessment. GGT and triglycerides were log-transformed.

**Supplemental Table 3. All-cause mortality and mortality from cardiovascular disease in female VHM&PP participants according to categories of longitudinal GGT-change after excluding female participants with baseline GGT concentrations >36 U/L and/or an GGT increase into the abnormal range (>36 U/L), VHM&PP 1985-2005**

|                                                         | Longitudinal GGT-change |                    |                  |                 |                  |                    |                      | p for trend GGT decrease* | p for trend GGT increase* |
|---------------------------------------------------------|-------------------------|--------------------|------------------|-----------------|------------------|--------------------|----------------------|---------------------------|---------------------------|
|                                                         | Decrease                |                    |                  | Stable          | Increase         |                    |                      |                           |                           |
|                                                         | Pronounced<br>n=3410    | Moderate<br>n=5923 | Mild<br>n=6078   |                 | Mild<br>n=6080   | Moderate<br>n=5967 | Pronounced<br>n=3521 |                           |                           |
| Longitudinal 7-year GGT-change (U/L) - Range            | <(-4.50)                | -4.49-(-1.98)      | -1.97-(-0.56)    | -0.55-0.79      | 0.80-2.27        | 2.28-5.15          | >5.15                |                           |                           |
| Longitudinal 7-year GGT-change - mean±SD (median) (U/L) | -7.6±4.9 (-6.4)         | -3.0±0.7 (-3.0)    | -1.2±0.4 (-1.2)  | 0.1±0.4 (0.0)   | 1.5±0.4 (1.4)    | 3.4±0.8 (3.3)      | 8.6±3.6 (7.5)        |                           |                           |
| Baseline GGT - mean±SD (median) (U/L)                   | 25.2±6.4 (25.1)         | 19.7±5.9 (17.9)    | 17.1±5.2 (16.1)  | 15.9±5.4 (14.3) | 15.2±5.4 (14.3)  | 15.3±5.9 (14.3)    | 16.1±5.5 (16.1)      |                           |                           |
| <b>ALL-CAUSE MORTALITY (n=1591)</b>                     |                         |                    |                  |                 |                  |                    |                      |                           |                           |
| HR (95% CI)†                                            | 1.08 (0.88-1.32)        | 1.02 (0.85-1.22)   | 0.95 (0.79-1.15) | 1.00 (Ref)      | 1.00 (0.83-1.21) | 1.16 (0.96-1.40)   | 1.28 (1.04-1.57)     | 0.38                      | 0.005                     |
| <b>TOTAL CVD MORTALITY (n=687)</b>                      |                         |                    |                  |                 |                  |                    |                      |                           |                           |
| HR (95% CI)†                                            | 0.94 (0.69-1.28)        | 0.93 (0.71-1.21)   | 0.84 (0.63-1.14) | 1.00 (Ref)      | 1.01 (0.76-1.34) | 1.14 (0.86-1.51)   | 1.25 (0.91-1.71)     | 0.88                      | 0.11                      |
| <b>CORONARY HEART DISEASE (n=314)</b>                   |                         |                    |                  |                 |                  |                    |                      |                           |                           |
| HR (95% CI)†                                            | 1.04 (0.65-1.67)        | 1.22 (0.81-1.83)   | 0.73 (0.46-1.17) | 1.00 (Ref)      | 1.14 (0.74-1.76) | 1.27 (0.82-1.96)   | 1.80 (1.15-2.81)     | 0.45                      | 0.008                     |
| <b>CONGESTIVE HEART FAILURE (n=72)</b>                  |                         |                    |                  |                 |                  |                    |                      |                           |                           |
| HR (95% CI)†                                            | 0.87 (0.36-2.10)        | 0.59 (0.25-1.38)   | 0.90 (0.40-2.01) | 1.00 (Ref)      | 0.78 (0.33-1.86) | 0.95 (0.40-2.25)   | 0.50 (0.14-1.77)     | 0.63                      | 0.42                      |
| <b>STROKE (n=178)</b>                                   |                         |                    |                  |                 |                  |                    |                      |                           |                           |
| HR (95% CI)†                                            | 0.81 (0.45-1.47)        | 0.64 (0.37-1.10)   | 0.98 (0.59-1.61) | 1.00 (Ref)      | 0.84 (0.49-1.43) | 1.01 (0.60-1.71)   | 0.73 (0.37-1.42)     | 0.33                      | 0.54                      |

\*Log-linear trends across categories of increasing or decreasing GGT, in respect to stable GGT, were tested using the median GGT-change for each category as an ordinal variable in an extended Cox proportional hazards model adjusted for age, body-mass-index, smoking status, occupational status, triglycerides, total cholesterol, systolic and diastolic blood pressure and blood glucose as time-varying covariates. All models are additionally adjusted for baseline GGT and the period of GGT-change assessment. GGT and triglycerides were log-transformed.

†Estimated from extended Cox proportional hazards models adjusted for age, body-mass-index, smoking status, occupational status, triglycerides, total cholesterol, systolic and diastolic blood pressure and blood glucose as time-varying covariates. All models are additionally adjusted for baseline GGT and period of GGT-change assessment. GGT and triglycerides were log-transformed.

**Supplemental Table 4. All-cause mortality and mortality from cardiovascular disease according to categories of longitudinal GGT-change in males with baseline age ≤60 years and >60 years, VHM&PP 1985-2005**

|                                                      | Longitudinal GGT-change |                     |                     |               |                     |                     | p for trend GGT decrease* | p for trend GGT increase* | HR per baseline GGT log-unit increase‡ | HR per GGT log-unit increase with GGT as time-varying covariate§ |                     |
|------------------------------------------------------|-------------------------|---------------------|---------------------|---------------|---------------------|---------------------|---------------------------|---------------------------|----------------------------------------|------------------------------------------------------------------|---------------------|
|                                                      | Decrease                |                     |                     | Stable        | Increase            |                     |                           |                           |                                        |                                                                  |                     |
|                                                      | Pronounced              | Moderate            | Mild                |               | Mild                | Moderate            |                           |                           |                                        |                                                                  | Pronounced          |
| <b>Age ≤60 years at baseline</b>                     |                         |                     |                     |               |                     |                     |                           |                           |                                        |                                                                  |                     |
| <b>ALL-CAUSE MORTALITY</b> (n=1142), HR (95% CI)†    | 0.95<br>(0.74-1.22)     | 0.96<br>(0.75-1.22) | 0.78<br>(0.59-1.01) | 1.00<br>(Ref) | 1.03<br>(0.79-1.33) | 1.04<br>(0.80-1.34) | 1.48<br>(1.17-1.87)       | 0.94                      | 0.001                                  | 2.64<br>(2.18-3.21)                                              | 3.29<br>(2.74-3.95) |
| <b>TOTAL CVD MORTALITY</b> (n=358), HR (95% CI)†     | 1.20<br>(0.75-1.92)     | 1.11<br>(0.70-1.77) | 0.96<br>(0.58-1.59) | 1.00<br>(Ref) | 1.07<br>(0.64-1.79) | 1.33<br>(0.83-2.16) | 1.72<br>(1.10-2.69)       | 0.44                      | 0.009                                  | 2.27<br>(1.61-3.20)                                              | 2.68<br>(1.92-3.73) |
| <b>CORONARY HEART DISEASE</b> (n=215), HR (95% CI)†  | 1.20<br>(0.66-2.19)     | 1.14<br>(0.63-2.08) | 0.85<br>(0.44-1.67) | 1.00<br>(Ref) | 1.17<br>(0.61-2.25) | 1.43<br>(0.77-2.64) | 1.33<br>(0.73-2.42)       | 0.26                      | 0.45                                   | 2.63<br>(1.72-4.04)                                              | 2.48<br>(1.60-3.83) |
| <b>CONGESTIVE HEART FAILURE</b> (n=23), HR (95% CI)† | 0.53<br>(0.08-3.26)     | 1.73<br>(0.44-6.85) | 0.59<br>(0.10-3.56) | 1.00<br>(Ref) | n.a.¶               | 0.67<br>(0.11-4.04) | 1.26<br>(0.28-5.73)       | 0.88                      | 0.55                                   | 1.64<br>(0.37-7.26)                                              | 1.76<br>(0.43-7.17) |
| <b>STROKE</b> (n=75), HR (95% CI)†                   | 1.31<br>(0.44-3.91)     | 0.80<br>(0.24-2.66) | 1.26<br>(0.40-3.96) | 1.00<br>(Ref) | 1.36<br>(0.41-4.46) | 1.62<br>(0.53-4.97) | 2.47<br>(0.88-6.92)       | 0.70                      | 0.02                                   | 2.50<br>(1.14-5.47)                                              | 3.92<br>(1.95-7.90) |
| <b>Age &gt;60 years at baseline</b>                  |                         |                     |                     |               |                     |                     |                           |                           |                                        |                                                                  |                     |
| <b>ALL-CAUSE MORTALITY</b> (n=1162), HR (95% CI)†    | 0.94<br>(0.73-1.19)     | 1.08<br>(0.86-1.33) | 1.00<br>(0.80-1.24) | 1.00<br>(Ref) | 1.08<br>(0.84-1.35) | 1.15<br>(0.90-1.47) | 1.28<br>(1.01-1.63)       | 0.74                      | 0.023                                  | 1.65<br>(1.32-2.07)                                              | 1.85<br>(1.41-2.42) |
| <b>TOTAL CVD MORTALITY</b> (n=628), HR (95% CI)†     | 0.95<br>(0.68-1.32)     | 0.95<br>(0.71-1.27) | 0.91<br>(0.67-1.23) | 1.00<br>(Ref) | 1.07<br>(0.80-1.48) | 1.15<br>(0.83-1.60) | 1.29<br>(0.93-1.79)       | 0.57                      | 0.065                                  | 1.47<br>(1.07-2.01)                                              | 1.60<br>(1.10-2.31) |
| <b>CORONARY HEART DISEASE</b> (n=326), HR (95% CI)†  | 0.84<br>(0.53-1.34)     | 0.86<br>(0.57-1.30) | 0.97<br>(0.65-1.45) | 1.00<br>(Ref) | 1.11<br>(0.72-1.71) | 1.21<br>(0.80-1.88) | 1.08<br>(0.68-1.72)       | 0.29                      | 0.43                                   | 1.10<br>(0.71-1.74)                                              | 1.52<br>(0.90-2.55) |
| <b>CONGESTIVE HEART FAILURE</b> (n=68), HR (95% CI)† | 1.15<br>(0.93-7.20)     | 0.43<br>(0.14-1.32) | 1.19<br>(0.48-2.95) | 1.00<br>(Ref) | 0.77<br>(0.27-2.24) | 0.96<br>(0.34-2.84) | 1.64<br>(0.64-4.24)       | 0.67                      | 0.39                                   | 3.59<br>(1.54-8.42)                                              | 2.58<br>(0.92-7.20) |
| <b>STROKE</b> (n=153), HR (95% CI)†                  | 1.39<br>(0.71-2.69)     | 1.37<br>(0.76-2.47) | 0.75<br>(0.38-1.45) | 1.00<br>(Ref) | 0.94<br>(0.46-1.93) | 1.37<br>(0.70-2.71) | 1.80<br>(0.94-3.45)       | 0.29                      | 0.03                                   | 1.95<br>(1.10-3.61)                                              | 1.40<br>(0.68-2.91) |

\*Log-linear trends across categories of increasing or decreasing GGT, in respect to stable GGT, were tested using the median GGT-change for each category as an ordinal variable in an extended Cox proportional hazards model adjusted for age, body-mass-index, smoking status, occupational status, triglycerides, total cholesterol, systolic and diastolic blood pressure and blood glucose as time-varying covariates. All models are additionally adjusted for baseline GGT and the period of GGT-change assessment. GGT and triglycerides were log-transformed.

†Estimated from extended Cox proportional hazards models adjusted for age, body-mass-index, smoking status, occupational status, triglycerides, total cholesterol, systolic and diastolic blood pressure and blood glucose as time-varying covariates. All models are additionally adjusted for baseline GGT and period of GGT-change assessment. GGT and triglycerides were log-transformed.

‡Estimated from Cox proportional hazards models adjusted for baseline age, body-mass-index, smoking status, occupational status, triglycerides, total cholesterol, systolic and diastolic blood pressure and blood glucose. GGT and triglycerides were log-transformed.

§Estimated from extended Cox proportional hazards models adjusted for age, body-mass-index, smoking status, occupational status, triglycerides, total cholesterol, systolic and diastolic blood pressure and blood glucose as time-varying covariates. GGT and triglycerides were log-transformed.

¶Insufficient events.

**Supplemental Table 5. All-cause mortality and mortality from cardiovascular disease according to categories of longitudinal GGT-change in females with baseline age ≤60 years and >60 years, VHM&PP 1985-2005**

|                                                         | Longitudinal GGT-change |                     |                     |               |                     |                     | p for trend<br>GGT<br>decrease* | p for trend<br>GGT<br>increase* | HR per<br>baseline GGT<br>log-unit<br>increase‡ | HR per GGT<br>log-unit<br>increase with<br>GGT as time-<br>varying<br>covariate§ |                     |
|---------------------------------------------------------|-------------------------|---------------------|---------------------|---------------|---------------------|---------------------|---------------------------------|---------------------------------|-------------------------------------------------|----------------------------------------------------------------------------------|---------------------|
|                                                         | Decrease                |                     | Stable              | Increase      |                     |                     |                                 |                                 |                                                 |                                                                                  |                     |
|                                                         | Pronounced              | Moderate            |                     | Mild          | Moderate            | Pronounced          |                                 |                                 |                                                 |                                                                                  |                     |
| <b>Age ≤60 years at baseline</b>                        |                         |                     |                     |               |                     |                     |                                 |                                 |                                                 |                                                                                  |                     |
| <b>ALL-CAUSE MORTALITY</b> (n=839),<br>HR (95% CI)†     | 1.03<br>(0.77-1.37)     | 1.16<br>(0.87-1.53) | 0.91<br>(0.67-1.23) | 1.00<br>(Ref) | 1.04<br>(0.77-1.41) | 1.13<br>(0.84-1.52) | 1.41<br>(1.07-1.84)             | 0.36                            | 0.005                                           | 2.32<br>(1.82-2.95)                                                              | 2.75<br>(2.19-3.45) |
| <b>TOTAL CVD MORTALITY</b> (n=188),<br>HR (95% CI)†     | 0.82<br>(0.45-1.52)     | 1.29<br>(0.73-2.26) | 0.52<br>(0.25-1.08) | 1.00<br>(Ref) | 1.06<br>(0.57-1.97) | 1.04<br>(0.56-1.93) | 1.30<br>(0.75-2.25)             | 0.77                            | 0.35                                            | 1.87<br>(1.12-3.11)                                                              | 2.47<br>(1.54-3.95) |
| <b>CORONARY HEART DISEASE</b> (n=79),<br>HR (95% CI)†   | 1.20<br>(0.48-3.04)     | 1.25<br>(0.51-3.08) | 0.60<br>(0.20-1.84) | 1.00<br>(Ref) | 0.81<br>(0.28-2.32) | 1.24<br>(0.49-3.14) | 1.47<br>(0.62-3.48)             | 0.54                            | 0.23                                            | 2.12<br>(0.98-4.61)                                                              | 1.05<br>(0.45-2.45) |
| <b>CONGESTIVE HEART FAILURE</b> (n=14),<br>HR (95% CI)† | n.a.¶                   | n.a.¶               | n.a.¶               | 1.00<br>(Ref) | n.a.¶               | n.a.¶               | n.a.¶                           | n.a.¶                           | n.a.¶                                           | n.a.¶                                                                            | n.a.¶               |
| <b>STROKE</b> (n=57), HR (95% CI)†                      | 0.40<br>(0.14-1.14)     | 0.67<br>(0.26-1.76) | 0.41<br>(0.13-1.33) | 1.00<br>(Ref) | 0.82<br>(0.31-2.15) | 0.67<br>(0.24-1.88) | 0.74<br>(0.30-1.85)             | 0.16                            | 0.56                                            | 2.03<br>(0.80-5.14)                                                              | 4.27<br>(1.96-9.23) |
| <b>Age &gt;60 years at baseline</b>                     |                         |                     |                     |               |                     |                     |                                 |                                 |                                                 |                                                                                  |                     |
| <b>ALL-CAUSE MORTALITY</b> (n=1408),<br>HR (95% CI)†    | 0.95<br>(0.76-1.18)     | 0.94<br>(0.75-1.16) | 0.97<br>(0.77-1.22) | 1.00<br>(Ref) | 1.02<br>(0.81-1.29) | 1.13<br>(0.90-1.42) | 1.14<br>(0.92-1.41)             | 0.63                            | 0.17                                            | 1.17<br>(0.95-1.49)                                                              | 1.39<br>(1.08-1.79) |
| <b>TOTAL CVD MORTALITY</b> (n=781),<br>HR (95% CI)†     | 0.92<br>(0.69-1.24)     | 0.89<br>(0.66-1.19) | 0.93<br>(0.69-1.26) | 1.00<br>(Ref) | 1.02<br>(0.75-1.38) | 1.12<br>(0.83-1.51) | 1.10<br>(0.83-1.47)             | 0.67                            | 0.52                                            | 1.05<br>(0.78-1.40)                                                              | 1.21<br>(0.86-1.70) |
| <b>CORONARY HEART DISEASE</b> (n=345),<br>HR (95% CI)†  | 1.13<br>(0.72-1.77)     | 1.22<br>(0.79-1.89) | 0.86<br>(0.52-1.41) | 1.00<br>(Ref) | 1.36<br>(0.85-2.16) | 1.29<br>(0.81-2.06) | 1.37<br>(0.88-2.12)             | 0.51                            | 0.18                                            | 1.25<br>(0.82-1.89)                                                              | 1.31<br>(0.79-2.15) |
| <b>CONGESTIVE HEART FAILURE</b> (n=83),<br>HR (95% CI)† | 0.64<br>(0.27-1.51)     | 0.38<br>(0.13-1.02) | 0.98<br>(0.45-2.15) | 1.00<br>(Ref) | 0.68<br>(0.28-1.66) | 0.92<br>(0.39-2.13) | 0.96<br>(0.43-2.13)             | 0.27                            | 0.83                                            | 0.61<br>(0.23-1.62)                                                              | 0.90<br>(0.30-2.66) |
| <b>STROKE</b> (n=209), HR (95% CI)†                     | 0.77<br>(0.44-1.35)     | 0.71<br>(0.40-1.24) | 1.10<br>(0.64-1.89) | 1.00<br>(Ref) | 0.78<br>(0.43-1.42) | 0.97<br>(0.55-1.72) | 0.94<br>(0.54-1.61)             | 0.30                            | 0.85                                            | 1.10<br>(0.63-1.93)                                                              | 1.41<br>(0.73-2.72) |

\*Log-linear trends across categories of increasing or decreasing GGT, in respect to stable GGT, were tested using the median GGT-change for each category as an ordinal variable in an extended Cox proportional hazards model adjusted for age, body-mass-index, smoking status, occupational status, triglycerides, total cholesterol, systolic and diastolic blood pressure and blood glucose as time-varying covariates. All models are additionally adjusted for baseline GGT and the period of GGT-change assessment. GGT and triglycerides were log-transformed.

†Estimated from extended Cox proportional hazards models adjusted for age, body-mass-index, smoking status, occupational status, triglycerides, total cholesterol, systolic and diastolic blood pressure and blood glucose as time-varying covariates. All models are additionally adjusted for baseline GGT and period of GGT-change assessment. GGT and triglycerides were log-transformed.

‡Estimated from Cox proportional hazards models adjusted for baseline age, body-mass-index, smoking status, occupational status, triglycerides, total cholesterol, systolic and diastolic blood pressure and blood glucose. GGT and triglycerides were log-transformed.

§Estimated from extended Cox proportional hazards models adjusted for age, body-mass-index, smoking status, occupational status, triglycerides, total cholesterol, systolic and diastolic blood pressure and blood glucose as time-varying covariates. GGT and triglycerides were log-transformed.

¶Insufficient events.
